# Supplementary material for: Effects of Catastrophic Insect Outbreaks on the Harvesting Solutions of Dahurian Larch Plantations
Source: Hindawi journal article supplement (doi:10.1155/2015/421858), 2015-01-01
Supplement: f1 [file 421858.f1.pdf]

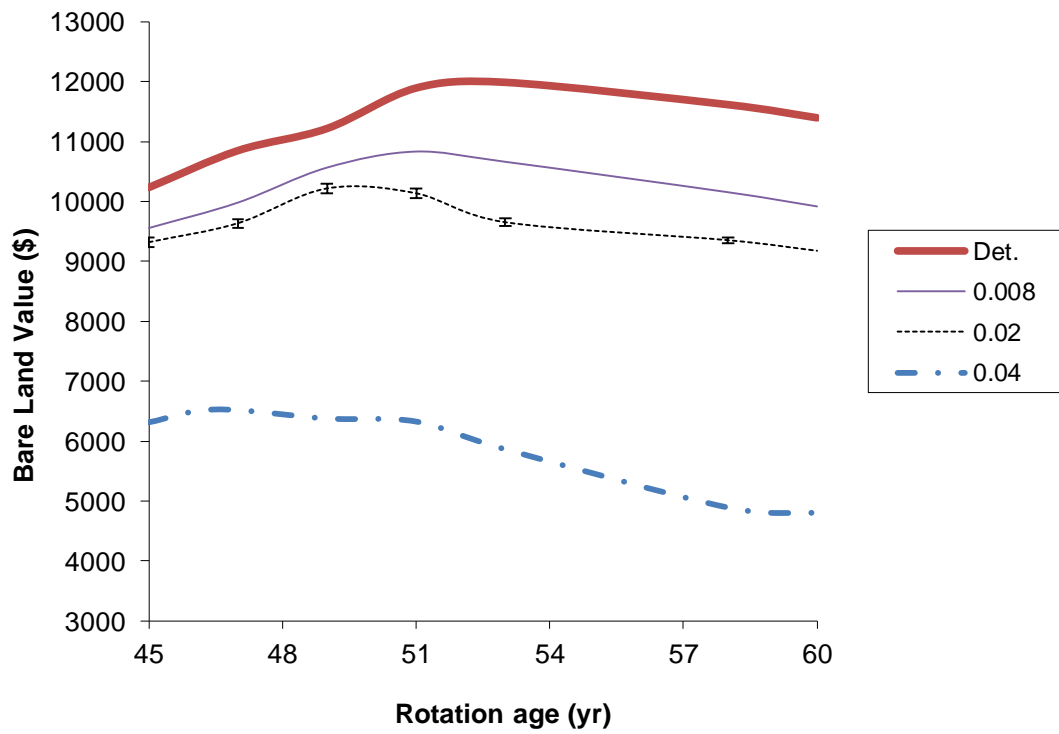

Figure 3. The effect of the increasing risk of a catastrophic insect outbreak on the bare land value for different rotations. Legend numbers refer to annual probability of disaster. The discount rate is 3.5%.

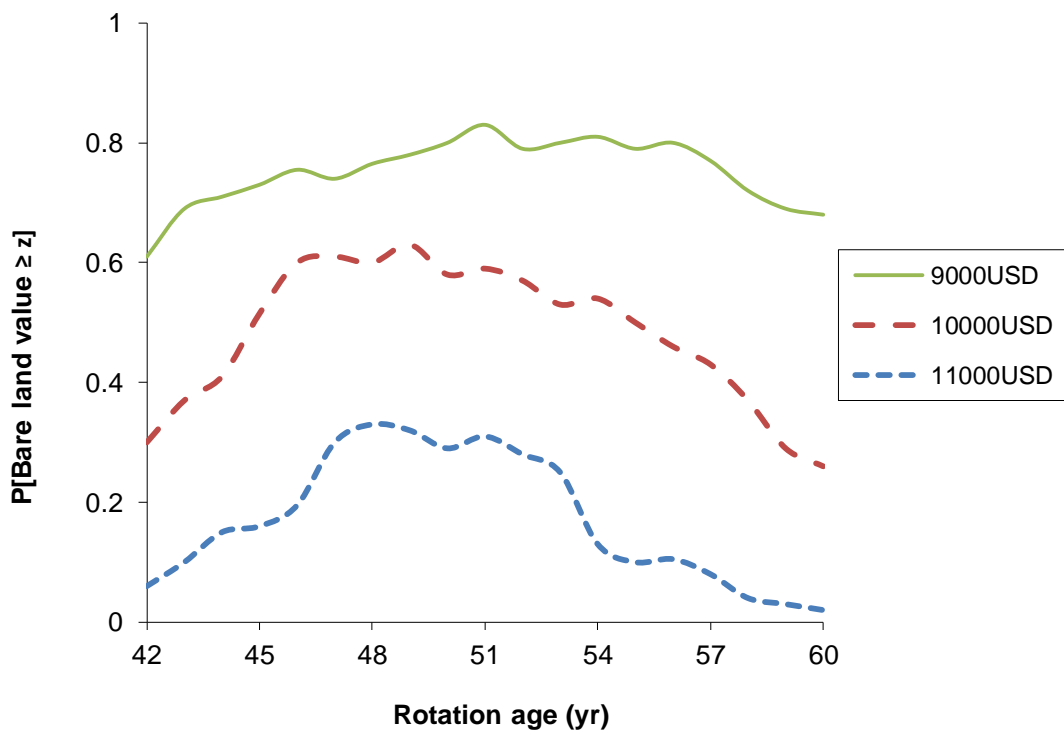

Figure 4. Probability that a computed bare land value (Dulaer 76), is greater than the specified bare land value target,  $z$ , for different rotations. The three targets are 9000, 10000 and 11000 USD, with 0.02 probability of catastrophic insect outbreak. Interest rate is 3.5%.

**Table 4. Effect of the increasing probability of a catastrophe (Pcat) on the economic thinning schedule of Dulaer 76. The discount rate is 3.5%**

| Pcat  | Rotation (y) | 1st thinning (y) | 2nd thinning (y) | 3rd thinning (y) | Bare land value (\$) |
|-------|--------------|------------------|------------------|------------------|----------------------|
| 0.0   | 53.2         | 33.2             | 38.1             | 43.3             | 11989.5              |
| 0.008 | 51.3         | 32.4             | 37.2             | 42.8             | 10834.1              |
| 0.02  | 49.0         | 30.2             | 35               | 41.9             | 10218.6              |
| 0.04  | 46.5         | 29.7             | 34.6             | -                | 6529.2               |

Supplementary

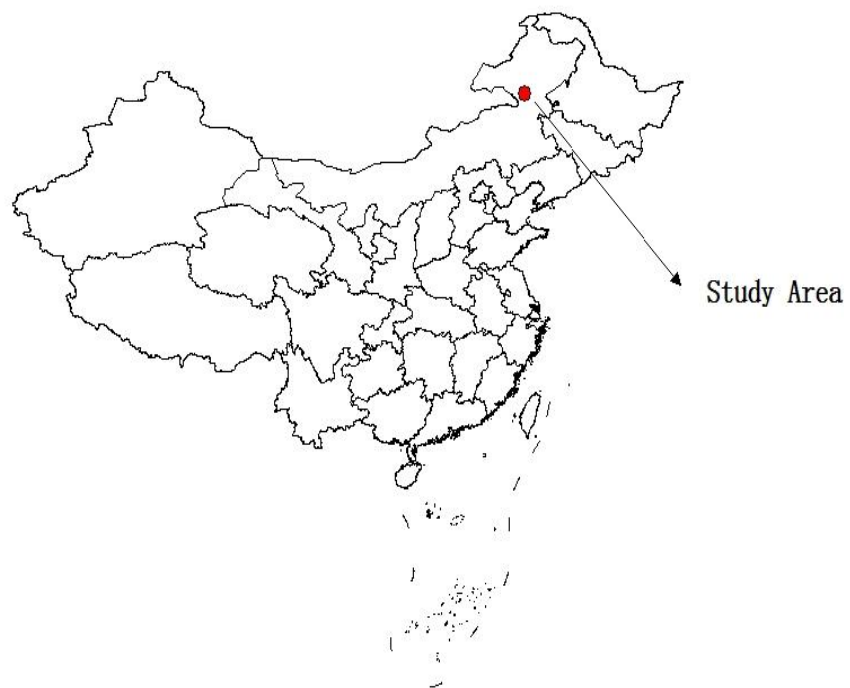

**Location of the study site (Aershan area  $47^{\circ}07'–47^{\circ}55'N$ ,  $119^{\circ}51'–120^{\circ}57'E$ )**
